# Supplementary material for: Activation of cGAS-STING Signal to Inhibit the Proliferation of Bladder Cancer: The Immune Effect of Cisplatin
Source: MDPI journal article supplement (doi:10.3390/cells11193011), 2022-09-27
Supplement: s1 [file s1]

## Supplementary Materials

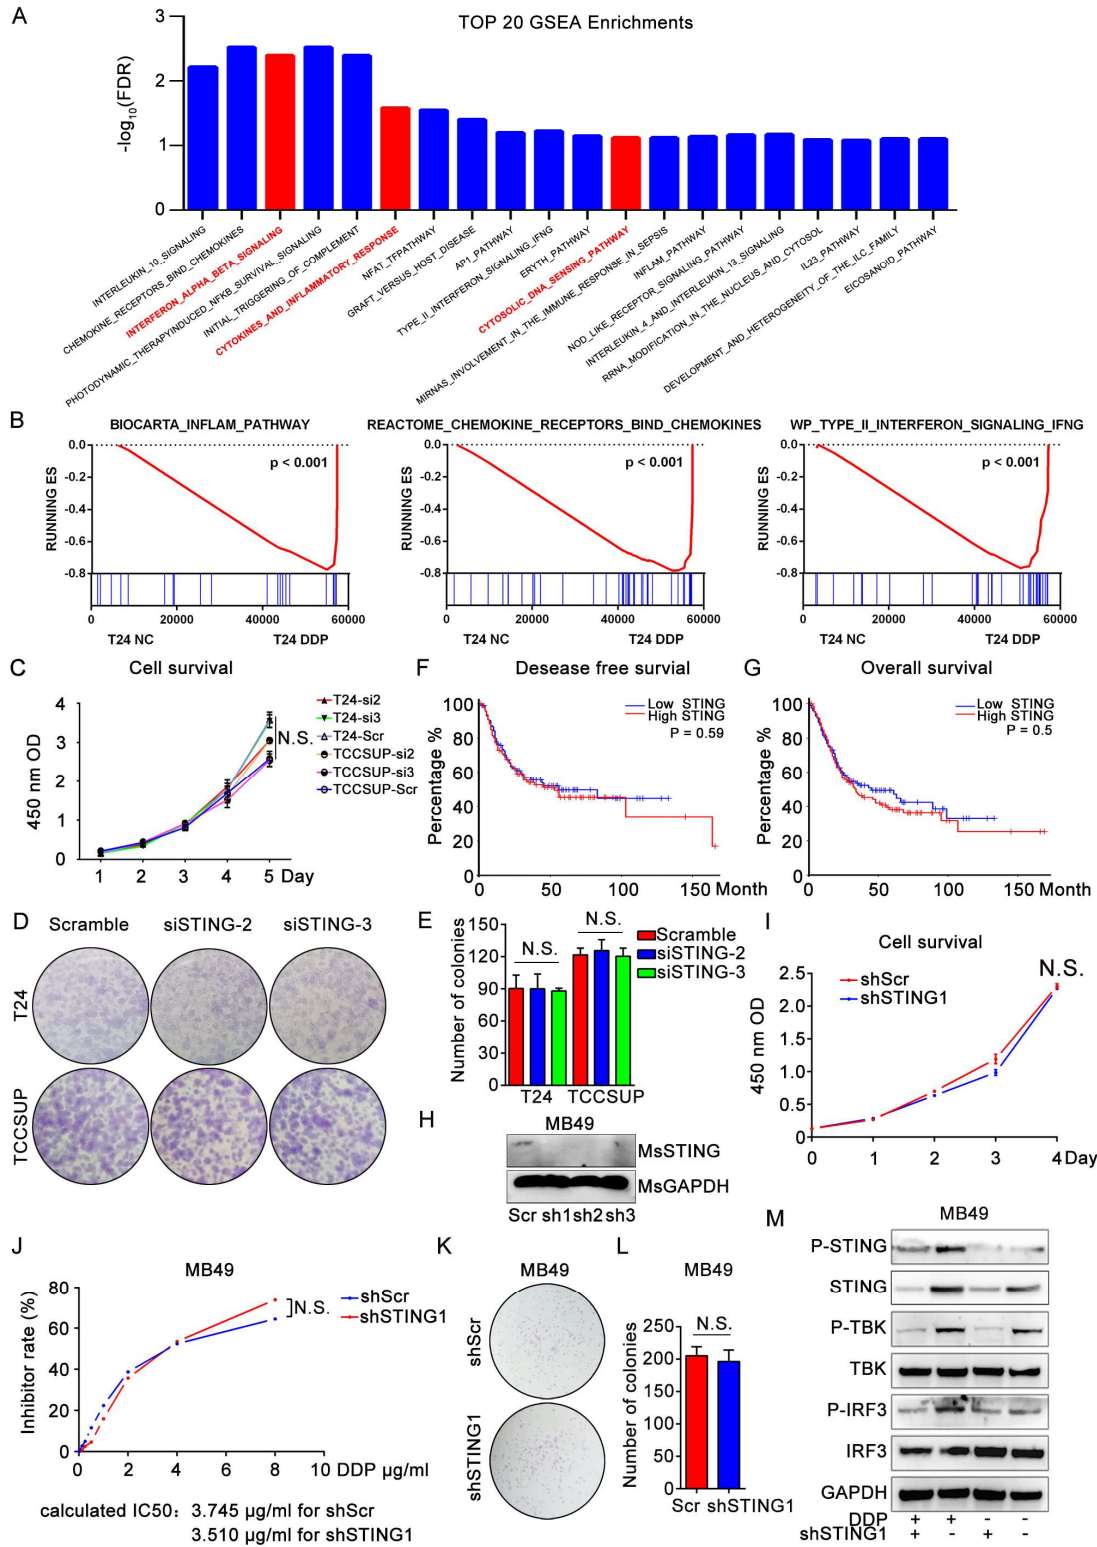

**Figure S1. Expression of STING did not affect proliferation of T24, TCCSUP and MB49 cell lines in vitro.** (A) Top 20 GSEA enrichment pathways in T24 cell lines with cisplatin treatment, 2  $\mu$ g/ml for 24 h. (B) Inflam- and immune- relative enrichment pathway in T24 cell lines with cisplatin treatment, 2  $\mu$ g/ml for 24 h. (C) T24 and TCCSUP cell lines were treated with non-targeting (Scramble, Scr) or two STING-targeting siRNA (si2 and si3) for 48 h before adding 1640 medium containing

10% CCK-8 reagent. The 450 nm OD of each groups were measure at day 1, 2, 3, 4, 5. (D, E) Clonal formation assay of T24 and TCCSUP cell lines treated with non-targeting (Scramble, Scr) or two STING-targeting siRNA (si2 and si3) for 48 h. (F, G) Kaplan-Meier analysis of (F) overall survival rates and (G) disease-free survival rates stratified by low STING expression (n = 201) and high STING expression (n = 201) from The Cancer Genome Atlas (TCGA) database. The median was used as the dividing line, and STING upregulation showed none significantly associated with overall and disease-free survival rates. DDP, cisplatin. (H) Knockdown efficiency validation of shSTING lentivirus in MB49 cell lines. GAPDH was used as control protein. (I) MB49 cell lines were treated with non-targeting (Scramble, Scr) lentivirus or STING-targeting lentivirus for 48 h before adding 1640 medium containing 10% CCK-8 reagent. The 450 nm OD of each groups were measure at day 0, 1, 2, 3, 4. (J) Calculated cisplatin IC50 of MB49 cell lines treated with non-targeting (Scramble, Scr) lentivirus or STING-targeting lentivirus for 48 h. (K, L) Clonal formation assay of MB49 cell lines treated with non-targeting (Scramble, Scr) lentivirus or STING-targeting lentivirus for 48 h. (M) Western blotting results of key proteins involved in cGAS-STING pathway in MB49 cell lines treated with 2  $\mu$ g/ml cisplatin or PBS for 24 h combined with or without STING-targeting treatment. GAPDH was used as the control protein. DDP, cisplatin. N.S.,  $P > 0.05$ .

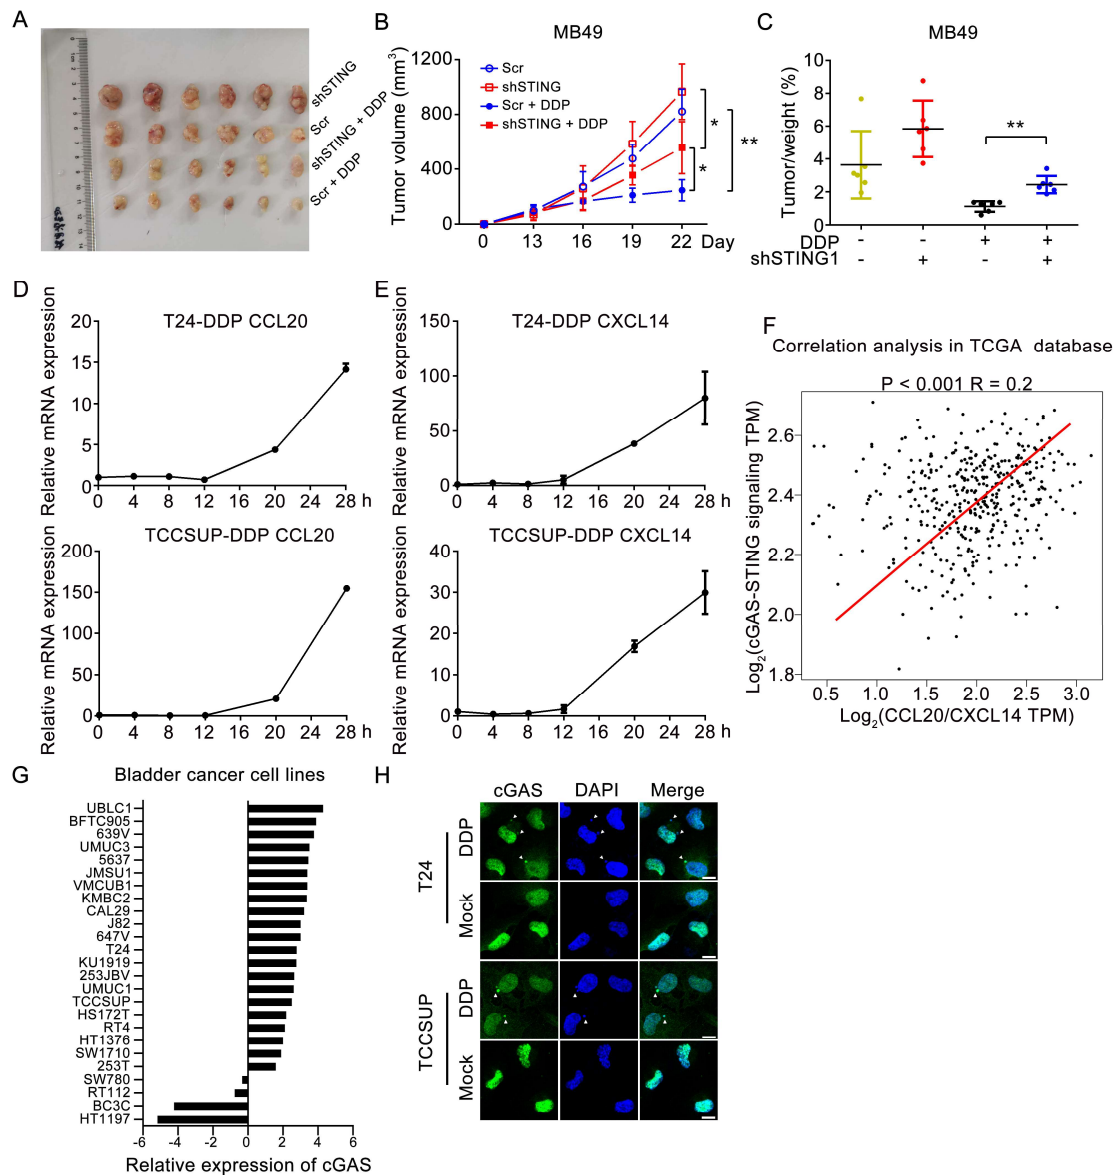

**Figure S2. Expression of STING did not affect proliferation and cisplatin sensitivity of MB49 cell lines.** (A) Different groups of tumor volumes in day 23. (B) Different groups of tumor proliferation curves. (C) Relative tumor weights of different groups. \* $P < 0.05$ , \*\* $P < 0.01$ . (D, E) T24 and TCCSUP cell lines were treated with 2  $\mu$ g/ml cisplatin for 0 h, 4 h, 8 h, 12 h, 20 h, 28 h, respectively. CCL20

(D) and CXCL14 (E) mRNA were then analyzed by qRT-PCR. (F) Correlation analysis between cGAS-STING signaling and CCL20/CXCL14 expression in TCGA database.  $P < 0.001$ ,  $R = 0.2$ . (G) Basic transcription levels of cGAS in bladder cancer cell line on CCLE database. (H) Cisplatin (2  $\mu\text{g/ml}$  cisplatin for 24 h) induced micronuclei in T24 and TCCSUP cell lines. Scale bar represent 5  $\mu\text{m}$ .

**Table S1.** The sequences of msSTING and siSTING and specific primers.

| shRNA                  | Sequences                                                   |
|------------------------|-------------------------------------------------------------|
| MsSTING-1-Forward      | CCGGAGAGGTCACCGCTCCAAATATCTCGAGATATTTGGAGCGGTGACCTCTTTTTTG  |
| MsSTING-1-Reverse      | AATTCAAAAAAGAGGTCACCGCTCCAAATATCTCGAGATATTTGGAGCGGTGACCTCT  |
| MsSTING-2-Forward      | CCGGATGATTCTACTATCGTCTTATCTCGAGATAAGACGATAGTAGAATCATTTTTTG  |
| MsSTING-2-Reverse      | AATTCAAAAAATGATTCTACTATCGTCTTATCTCGAGATAAGACGATAGTAGAATCAT  |
| MsSTING-3-Forward      | CCGGCAACATTTCGATTCCGAGATATCTCGAGATATCTCGGAATCGAATGTTGTTTTTG |
| MsSTING-3-Reverse      | AATTCAAAAACAACATTTCGATTCCGAGATATCTCGAGATATCTCGGAATCGAATGTTG |
| siRNA                  | Sequences                                                   |
| siSTING-1              | CATGGTCATATTACATCGGAT                                       |
| siSTING-2              | GCTGGCATGGTCATATTACAT                                       |
| siSTING-3              | GTCCAGGACTTGACATCTTAA                                       |
| PCR Primer             | Sequences                                                   |
| CXCL1-Forward          | ACAGTGTGTGGTCAACATTTCT                                      |
| CXCL1-Reverse          | AGCCCCTTTGTCTAAGCCA                                         |
| CXCL2-Forward          | CAGTGTGTGGTCAACATTTCTCA                                     |
| CXCL2-Reverse          | TGCTCTAACACAGAGGGAAACA                                      |
| CXCL3-Forward          | CGCCCAAACCGAAGTCATAG                                        |
| CXCL3-Reverse          | TCTGGTAAGGGCAGGGACC                                         |
| CXCL4-Forward          | CCACACTTAACGGAGAGCCT                                        |
| CXCL4-Reverse          | AGGTGGTCTTCACACACAGG                                        |
| CXCL5-Forward          | TGCTGAGCTTTTTAGATGCCT                                       |
| CXCL5-Reverse          | AGACTATGAACCAATGAGACACA                                     |
| CXCL6-Forward          | ACGCTGAGAGTAAACCCCAA                                        |
| CXCL6-Reverse          | CCAGACAAACTTGCTTCCCG                                        |
| CXCL7-Forward          | GTGATCGGGAAAGGAACCCA                                        |
| CXCL7-Reverse          | AGCAGATTCATCACCTGCCA                                        |
| CXCL8-Forward          | TGACCCCAAGGAAAACCTGG                                        |
| CXCL8-Reverse          | AAGTTTCACTGGCATCTTCACTG                                     |
| CXCL14-Forward         | ATGAAGCCAAAGTACCCGCA                                        |
| CXCL14-Reverse         | CTTCTCGTTCCAGGCGTTGT                                        |
| CXCL16-Forward         | GGCACCTGACTCTAATACCTGA                                      |
| CXCL16-Reverse         | GCAGTGGCTGGTTAGTCCTAT                                       |
| CCL5-Forward           | CAGTCGTCCACAGGTCAAGG                                        |
| CCL5-Reverse           | TTCTCTGGGTTGGCACACAC                                        |
| CCL19-Forward          | CCATCCCTGGGTACATCGTG                                        |
| CCL19-Reverse          | GCAGTCTCTGGATGATGCGT                                        |
| CCL20-Forward          | AACCATGTGCTGTACCAAGAGT                                      |
| CCL20-Reverse          | AAGTTGCTTGCTTCTGATTTCGC                                     |
| CCL21-Forward          | TGCAGCATCTGGACAAGACA                                        |
| CCL21-Reverse          | CCTTTAGGGGTCTGTGACCG                                        |
| IL-6-Forward           | CAGCCCTGAGAAAGGAGACAT                                       |
| IL-6-Reverse           | GGTTCAGGTTGTTTTCTGCCA                                       |
| TNF- $\alpha$ -Forward | CCCGAGTGACAAGCCTGTAG                                        |
| TNF- $\alpha$ -Reverse | TGAGGTACAGGCCCTCTGAT                                        |
| INF- $\beta$ -Forward  | CAGCATCTGCTGGTTGAAGA                                        |
| INF- $\beta$ -Reverse  | CATTACCTGAAGGCCAAGGA                                        |

**Table S2. The sequencing coverage and quality statistics for each sample.**

| Sample ID | Total number of sequenced reads | Total number of uniquely mapped non-duplicate reads <sup>a</sup> | RNA integrity number (RIN) | Ratio of all reads aligned to rRNA regions to total uniquely mapped reads (rRNA rate) | Ratio of exon-mapped reads to total uniquely mapped reads (Expression Profile Efficiency) | Total number of detected transcripts with reads $\geq 1$ <sup>b</sup> |
|-----------|---------------------------------|------------------------------------------------------------------|----------------------------|---------------------------------------------------------------------------------------|-------------------------------------------------------------------------------------------|-----------------------------------------------------------------------|
| T24DDP2   | 43688566                        | 41149832(94.19%)                                                 | >7                         | unknown                                                                               | 5765554923(91.2064%)                                                                      | 24988                                                                 |
| T24DDP1   | 43426958                        | 40877691(94.13%)                                                 | >7                         | unknown                                                                               | 5757569876(91.6351%)                                                                      | 24731                                                                 |
| T24DDP3   | 41373478                        | 38932654(94.1%)                                                  | >7                         | unknown                                                                               | 5384577085(90.0616%)                                                                      | 25180                                                                 |
| T24NC2    | 46041354                        | 43248261(93.93%)                                                 | >7                         | unknown                                                                               | 6152975627(92.4967%)                                                                      | 23686                                                                 |
| T24NC3    | 43789786                        | 41206904(94.1%)                                                  | >7                         | unknown                                                                               | 5889299096(92.9955%)                                                                      | 23167                                                                 |
| T24NC1    | 46520052                        | 43510283(93.53%)                                                 | >7                         | unknown                                                                               | 6229786100(93.1316%)                                                                      | 23425                                                                 |
